# Supplementary material for: Neuroblastoma Patients’ Outcome and Chromosomal Instability
Source: MDPI journal article supplement (doi:10.3390/ijms242115514), 2023-10-24
Supplement: s1 [file s1]

## Supplementary Tables

**Supplementary Table S2.** Overall and Event Free Survival of 441 NB patients diagnosed between 1999 and 2020, in relation to the BPI levels evaluated by the Cox model.

|                            |         | Univariable analysis |             |          | Multivariable analysis |             |          |
|----------------------------|---------|----------------------|-------------|----------|------------------------|-------------|----------|
| BPI                        | N/O     | HR                   | 95%CI       | <i>p</i> | HR                     | 95%CI       | <i>p</i> |
| <b>Overall Survival</b>    |         |                      |             | < 0.001  |                        |             | < 0.001  |
| 0 – 3                      | 161/4   | 1 (ref.)             | -           |          | 1 (ref.)               | -           |          |
| 4 – 12                     | 157/38  | 10.8                 | 3.8 – 30.2  |          | 3.5                    | 1.1 – 10.8  |          |
| ≥ 13                       | 123/55  | 24.5                 | 8.9 – 67.9  |          | 7.3                    | 2.4 – 22.6  |          |
| Original variable          | 441/97  | 1.08                 | 1.06 – 1.10 | < 0.001  | 1.04                   | 1.02 – 1.07 | < 0.001  |
| <b>Event Free Survival</b> |         |                      |             | < 0.001  |                        |             | < 0.001  |
| 0 – 3                      | 161/16  | 1 (ref.)             | -           |          | 1 (ref.)               | -           |          |
| 4 – 12                     | 157/54  | 3.9                  | 2.2 – 6.9   |          | 2.7                    | 1.4 – 5.4   |          |
| ≥ 13                       | 123/68  | 7.4                  | 4.3 – 12.8  |          | 4.3                    | 2.1 – 8.7   |          |
| Original variable          | 441/138 | 1.06                 | 1.05 – 1.08 | < 0.001  | 1.03                   | 1.01 – 1.05 | 0.005    |

N/O: Number of patients/Outcome (Deaths or Events). HR: Hazard Ratio. Multivariable analysis: HRs are adjusted by MYCN status, age, and stage at diagnosis. ref. = referent group. Original variable = original values of BPI non categorized to assess the linear trend.

**Supplementary Table S3.** Overall and Event Free Survival of 318 patients diagnosed between 1999 and 2020 with not amplified MYCN status in relation to the BPI levels evaluated by the Cox model.

|                            |        | Univariable analysis |             |          | Multivariable analysis |             |          |
|----------------------------|--------|----------------------|-------------|----------|------------------------|-------------|----------|
| BPI                        | N/O    | HR                   | 95%CI       | <i>p</i> | HR                     | 95%CI       | <i>p</i> |
| <b>Overall Survival</b>    |        |                      |             | < 0.001  |                        |             | 0.006    |
| 0 – 2                      | 89/1   | 1 (ref.)             | -           |          | 1 (ref.)               | -           |          |
| 3 – 7                      | 107/6  | 4.7                  | 0.56 – 38.9 |          | 2.4                    | 0.28 – 20.8 |          |
| ≥ 8                        | 122/40 | 34.1                 | 4.7 – 248.4 |          | 7.7                    | 0.95 – 62.1 |          |
| Original variable          | 318/47 | 1.10                 | 1.08 – 1.13 | < 0.001  | 1.05                   | 1.02 – 1.09 | 0.002    |
| <b>Event Free Survival</b> |        |                      |             | < 0.001  |                        |             | < 0.001  |
| 0 – 2                      | 89/6   | 1 (ref.)             | -           |          | 1 (ref.)               | -           |          |
| 3 – 7                      | 107/15 | 2.1                  | 0.81 – 5.4  |          | 2.1                    | 0.75 – 5.9  |          |
| ≥ 8                        | 122/63 | 9.6                  | 4.2 – 22.3  |          | 7.4                    | 2.7 – 20.5  |          |
| Original variable          | 318/84 | 1.07                 | 1.05 – 1.09 | < 0.001  | 1.04                   | 1.02 – 1.07 | 0.002    |

N/O: Number of patients/Outcome (Deaths or Events). HR: Hazard Ratio. Multivariable analysis: HRs are adjusted by age, and stage at diagnosis. ref. = referent group. Original variable = original values of BPI non categorized to assess the linear trend.

**Supplementary Table S4.** Overall and Event Free Survival of 100 patients diagnosed between 1999 and 2020 with amplified *MYCN* status in relation to the BPI levels evaluated by the Cox model.

|                            |        | Univariable analysis |             |          | Multivariable analysis |             |          |
|----------------------------|--------|----------------------|-------------|----------|------------------------|-------------|----------|
| BPI                        | N/O    | HR                   | 95%CI       | <i>p</i> | HR                     | 95%CI       | <i>p</i> |
| <b>Overall Survival</b>    |        |                      |             | 0.087    |                        |             | 0.122    |
| 0 – 9                      | 27/11  | 1 (ref.)             | -           |          | 1 (ref.)               | -           |          |
| 10 – 13                    | 37/15  | 0.87                 | 0.40 – 1.9  |          | 0.85                   | 0.38 – 1.9  |          |
| ≥ 14                       | 36/22  | 1.7                  | 0.84 – 3.6  |          | 1.7                    | 0.80 – 3.6  |          |
| Original variable          | 100/48 | 1.03                 | 0.99 – 1.07 | 0.168    | 1.02                   | 0.98 – 1.06 | 0.313    |
| <b>Event Free Survival</b> |        |                      |             | 0.202    |                        |             | 0.264    |
| 0 – 9                      | 27/13  | 1 (ref.)             | -           |          | 1 (ref.)               | -           |          |
| 10 – 13                    | 37/16  | 0.79                 | 0.38 – 1.7  |          | 0.75                   | 0.35 – 1.6  |          |
| ≥ 14                       | 36/22  | 1.5                  | 0.74 – 2.9  | 0.329    | 1.4                    | 0.70 – 2.9  |          |
| Original variable          | 100/51 | 1.02                 | 0.98 – 1.05 | 0.329    | 1.01                   | 0.97 – 1.05 | 0.558    |

N/O: Number of patients/Outcome (Deaths or Events). HR: Hazard Ratio. Multivariable analysis: HRs are adjusted by age, stage at diagnosis and treatment era. ref. = referent group. Original variable = original values of BPI non categorized to assess the linear trend.

**Supplementary Table S5.** Overall and Event Free Survival of 237 patients diagnosed between 1999 and 2020 with localized stage at diagnosis in relation to the BPI levels evaluated by the Cox model.

|                            |        | Univariable analysis |             |          | Multivariable analysis |             |          |
|----------------------------|--------|----------------------|-------------|----------|------------------------|-------------|----------|
| BPI                        | N/O    | HR                   | 95%CI       | <i>p</i> | HR                     | 95%CI       | <i>p</i> |
| <b>Overall Survival</b>    |        |                      |             | < 0.001  |                        |             | 0.003    |
| 0 – 2                      | 81/1   | 1 (ref.)             | -           |          | 1 (ref.)               | -           |          |
| 3 – 5                      | 76/1   | 1.07                 | 0.07 – 17.2 |          | 1.1                    | 0.07 – 18.6 |          |
| ≥ 6                        | 80/23  | 22.9                 | 3.1 – 169.4 |          | 11.2                   | 1.4 – 92.0  |          |
| Original variable          | 237/25 | 1.13                 | 1.09 – 1.18 | < 0.001  | 1.14                   | 1.07 – 1.21 | < 0.001  |
| <b>Event Free Survival</b> |        |                      |             | < 0.001  |                        |             | < 0.001  |
| 0 – 2                      | 81/5   | 1 (ref.)             | -           |          | 1 (ref.)               | -           |          |
| 3 – 5                      | 76/7   | 1.5                  | 0.47 – 4.7  |          | 1.6                    | 0.49 – 5.0  |          |
| ≥ 6                        | 80/33  | 8.2                  | 3.2 – 20.9  |          | 7.3                    | 2.6 – 20.1  |          |
| Original variable          | 237/45 | 1.11                 | 1.08 – 1.14 | < 0.001  | 1.10                   | 1.05 – 1.15 | < 0.001  |

N/O: Number of patients/Outcome (Deaths or Events). HR: Hazard Ratio. Multivariable analysis: HRs are adjusted by *MYCN* status, age at diagnosis and treatment era. ref. = referent group. Original variable = original value of BPI non categorized to assess the linear trend.

**Supplementary Table S6.** Overall and Event Free Survival of 166 patients diagnosed between 1999 and 2020 with stage M at diagnosis in relation to the BPI levels evaluated by the Cox model.

|                            |        | Univariable analysis |             |          | Multivariable analysis |             |          |
|----------------------------|--------|----------------------|-------------|----------|------------------------|-------------|----------|
| BPI                        | N/O    | HR                   | 95%CI       | <i>p</i> | HR                     | 95%CI       | <i>p</i> |
| <b>Overall Survival</b>    |        |                      |             | n.e.     |                        |             | n.e.     |
| 0 – 9                      | 42/13  | 1 (ref.)             | -           |          | 1 (ref.)               | -           |          |
| 10 – 16                    | 66/28  | 1.7                  | 0.88 – 3.3  |          | 1.5                    | 0.75 – 2.8  |          |
| ≥ 17                       | 58/31  | 2.2                  | 1.1 – 4.2   |          | 2.3                    | 1.1 – 4.5   |          |
| Original variable          | 166/72 | 1.02                 | 1.00 – 1.05 | 0.077    | 1.02                   | 1.00 – 1.05 | 0.090    |
| <b>Event Free Survival</b> |        |                      |             | n.e.     |                        |             | n.e.     |
| 0 – 9                      | 42/18  | 1 (ref.)             | -           |          | 1 (ref.)               | -           |          |
| 10 – 16                    | 66/34  | 1.4                  | 0.77 – 2.4  |          | 1.2                    | 0.67 – 2.1  |          |
| ≥ 17                       | 58/38  | 1.6                  | 0.91 – 2.8  |          | 1.5                    | 0.81 – 2.7  |          |
| Original variable          | 166/90 | 1.01                 | 0.99 – 1.04 | 0.257    | 1.00                   | 0.98 – 1.03 | 0.464    |

N/O: Number of patients/Outcome (Deaths or Events). HR: Hazard Ratio. Multivariable analysis: HRs are adjusted by MYCN status, age at diagnosis and treatment era. n.e. = not evaluable due to the violation of the proportional hazards' assumption. ref. = referent group. Original variable = original value of BPI non categorized to assess the linear trend.

**Supplementary Table S7.** Overall and Event Free Survival of 256 patients diagnosed between 1999 and 2020 with segmental chromosomal aberrations at diagnosis in relation to the BPI levels evaluated by the Cox model.

|                            |         | Univariable analysis |             |          | Multivariable analysis |             |          |
|----------------------------|---------|----------------------|-------------|----------|------------------------|-------------|----------|
| BPI                        | N/O     | HR                   | 95%CI       | <i>p</i> | HR                     | 95%CI       | <i>p</i> |
| <b>Overall Survival</b>    |         |                      |             | < 0.001  |                        |             | 0.003    |
| 0 – 9                      | 68/14   | 1 (ref.)             | -           |          | 1 (ref.)               | -           |          |
| 10 – 15                    | 87/28   | 1.6                  | 0.84 – 3.1  |          | 1.1                    | 0.57 – 2.1  |          |
| ≥ 16                       | 101/49  | 3.0                  | 1.6 – 5.4   |          | 2.3                    | 1.2 – 4.3   |          |
| Original variable          | 256/91  | 1.04                 | 1.02 – 1.07 | < 0.001  | 1.03                   | 1.00 – 1.06 | 0.025    |
| <b>Event Free Survival</b> |         |                      |             | < 0.001  |                        |             | 0.002    |
| 0 – 9                      | 68/22   | 1 (ref.)             | -           |          | 1 (ref.)               | -           |          |
| 10 – 15                    | 87/36   | 1.3                  | 0.76 – 2.2  |          | 1.0                    | 0.60 – 1.8  |          |
| ≥ 16                       | 101/60  | 2.2                  | 1.4 – 3.6   |          | 1.8                    | 1.0 – 3.0   |          |
| Original variable          | 256/118 | 1.03                 | 1.01 – 1.05 | 0.003    | 1.02                   | 1.00 – 1.04 | 0.107    |

N/O: Number of patients/Outcome (Deaths or Events). HR: Hazard Ratio. Multivariable analysis: HRs are adjusted by MYCN status, stage, age at diagnosis and treatment era. n.e. = not evaluable due to the violation of the proportional hazards' assumption. ref. = referent group. Original variable = original value of BPI non categorized to assess the linear trend.
